# Supplementary material for: Synthesis and spectroscopic properties of meso-substituted quinoxalinoporphyrins
Source: Royal Society of Chemistry journal article supplement (doi:10.1039/c1nj20248k), 2011-01-01
Supplement: c1nj20248k.pdf [file c1nj20248k.pdf]

## Supporting Information

### Synthesis and spectroscopic properties of *meso*-substituted quinoxalinoporphyrins

Satyasheel Sharma and Mahendra Nath\*

Department of Chemistry, University of Delhi, Delhi 110 007, India

Fax: 091-11-27666605; Tel: 091-11-27667794, Extn.186

E-mail: [mnath@chemistry.du.ac.in](mailto:mnath@chemistry.du.ac.in)

#### Table of contents:

**Figure 1:**  $^1\text{H}$  NMR spectrum of **3a**.

**Figure 2:**  $^1\text{H}$  NMR spectrum of **3b**.

**Figure 3:**  $^1\text{H}$  NMR spectrum of **3c**.

**Figure 4:**  $^1\text{H}$  NMR spectrum of **3d**.

**Figure 5:**  $^1\text{H}$  NMR spectrum of **3e**.

**Figure 6:**  $^1\text{H}$  NMR spectrum of **3f**.

**Figure 7:**  $^1\text{H}$  NMR spectrum of **3g**.

**Figure 8:**  $^1\text{H}$  NMR spectrum of **4**.

**Figure 9:**  $^1\text{H}$  NMR spectrum of **5**.

**Figure 10:**  $^1\text{H}$  NMR spectrum of **6**.

**Figure 11:**  $^1\text{H}$  NMR spectrum of **Zn-4**.

**Figure 12:**  $^1\text{H}$  NMR spectrum of **Zn-5**.

**Figure 13:**  $^1\text{H}$  NMR spectrum of **Zn-6**.

**Figure 14:**  $^1\text{H}$  NMR spectrum of **10a**.

**Figure 15:**  $^1\text{H}$  NMR spectrum of **10b**

**Figure 16:**  $^1\text{H}$  NMR spectrum of **10c**.

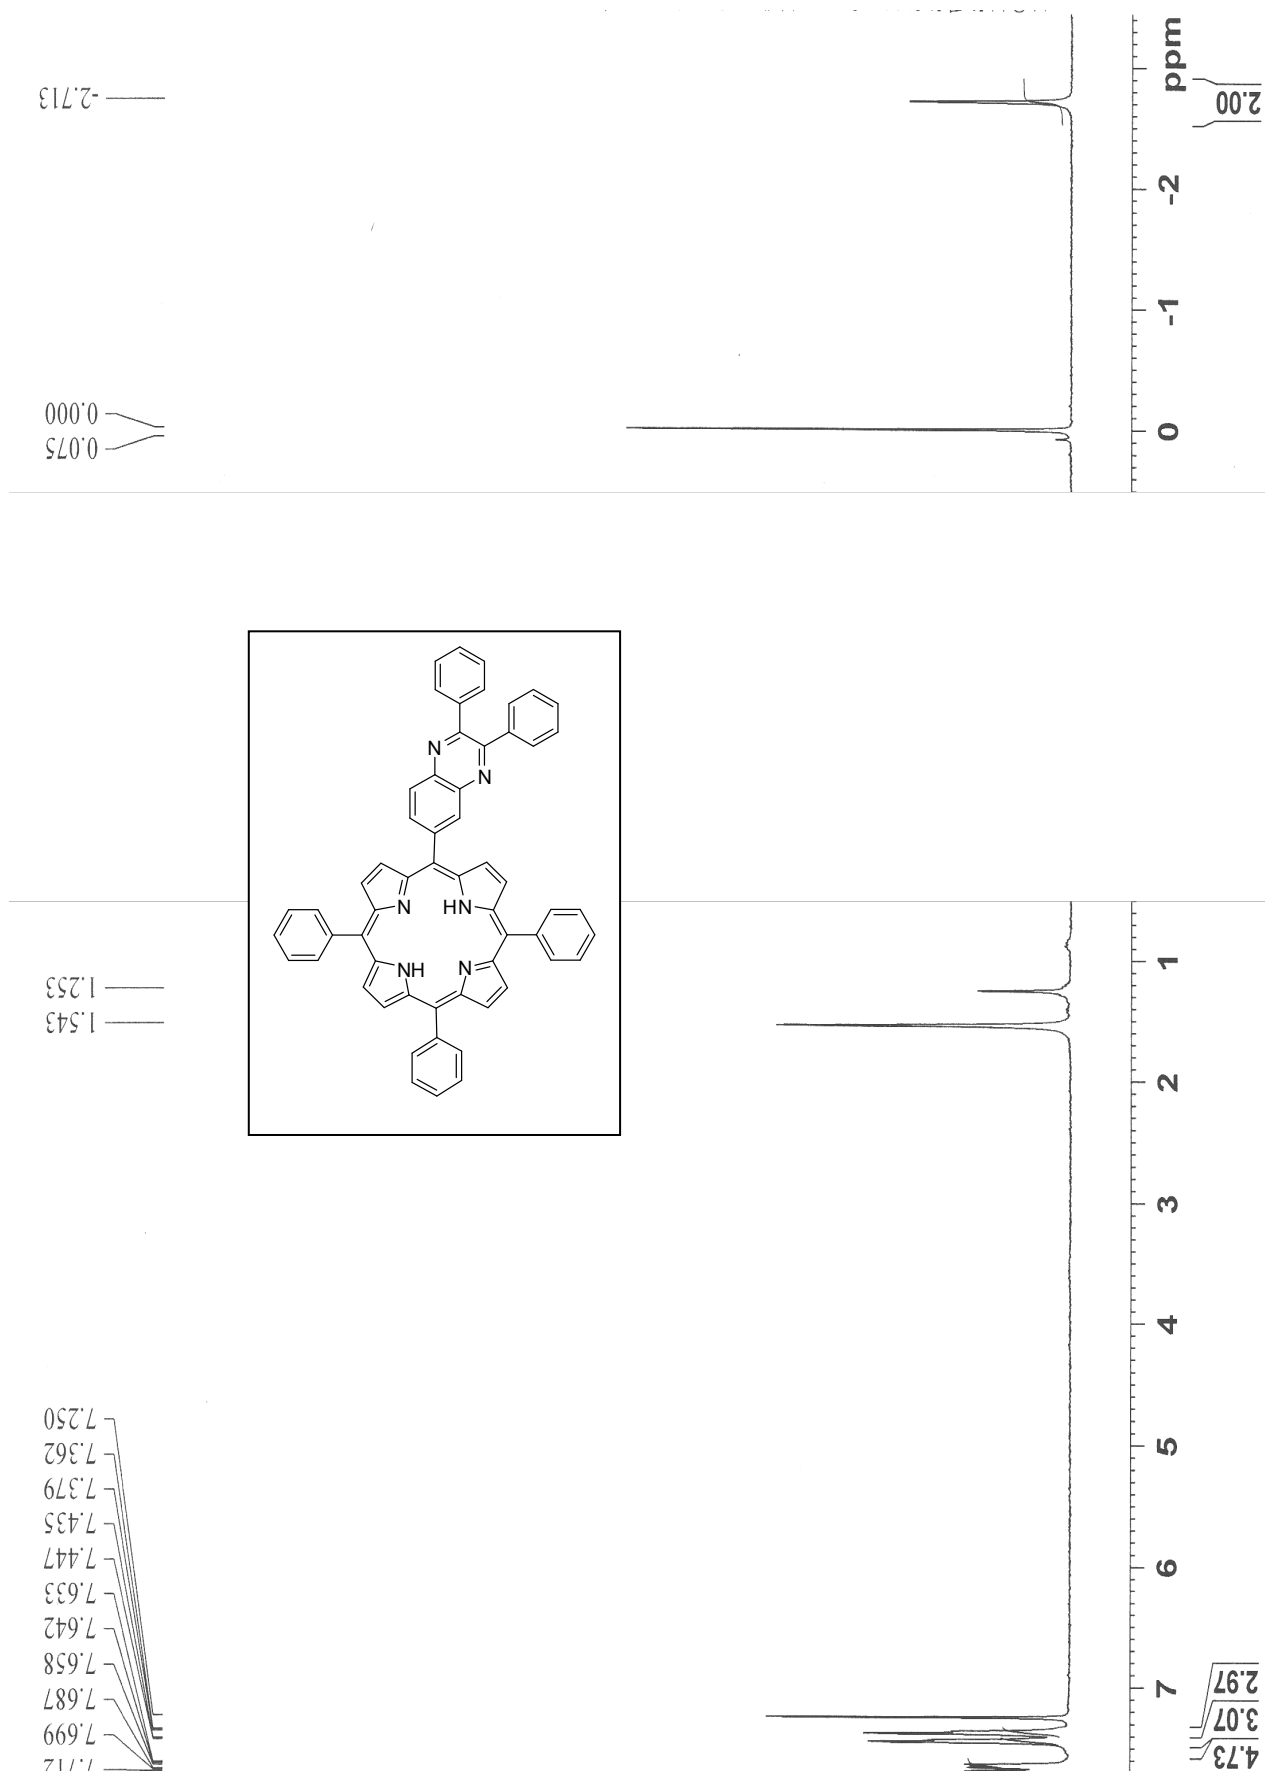

Fig. 1: <sup>1</sup>H NMR spectrum of 5-(2,3-diphenylquinoxalin-6-yl)-10,15,20-triphenylporphyrin (3a).

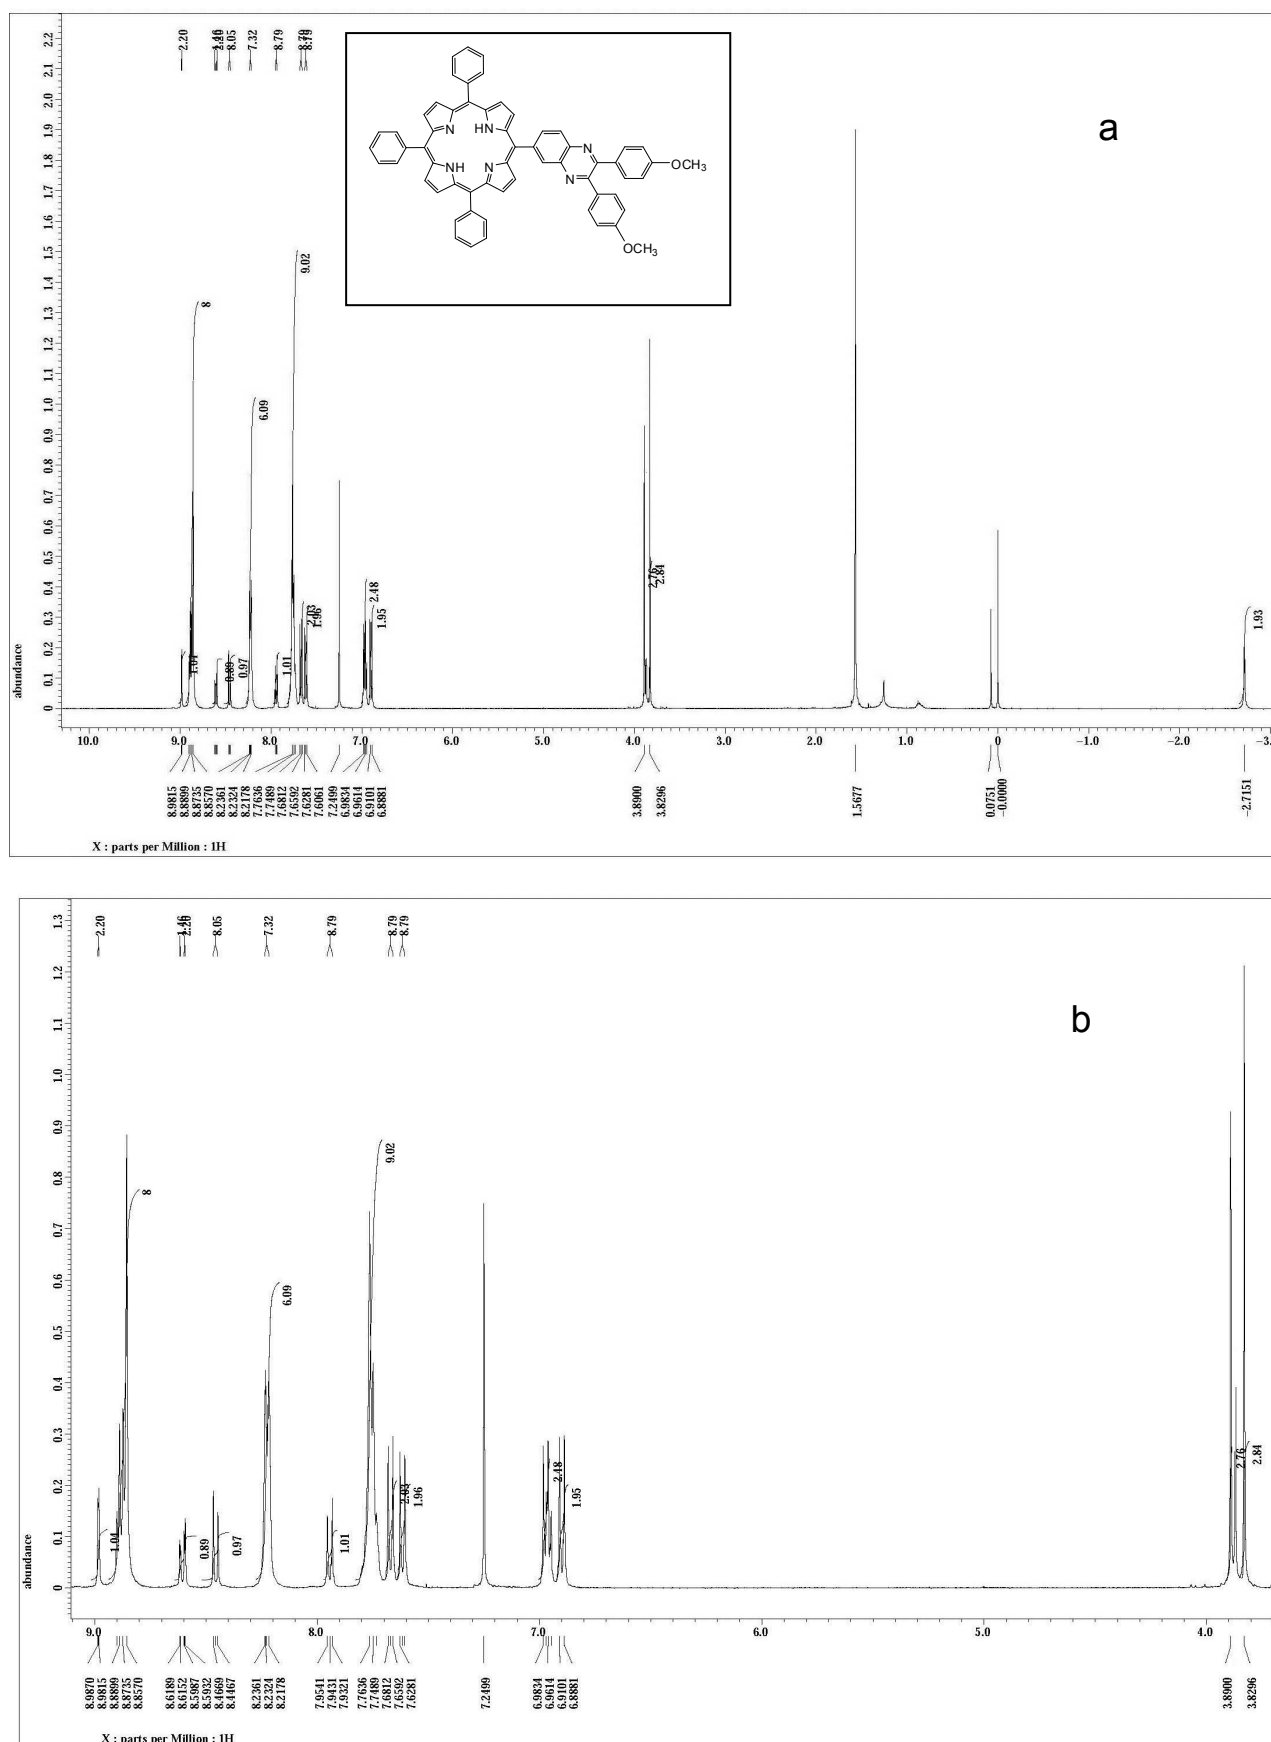

**Fig. 2:** (a)  $^1\text{H}$  NMR spectrum of 5-[2,3-bis-(4-methoxyphenyl)quinoxalin-6-yl]-10,15,20-triphenylporphyrin (**3b**); (b) Expanded region of  $^1\text{H}$  NMR spectrum of (**3b**).

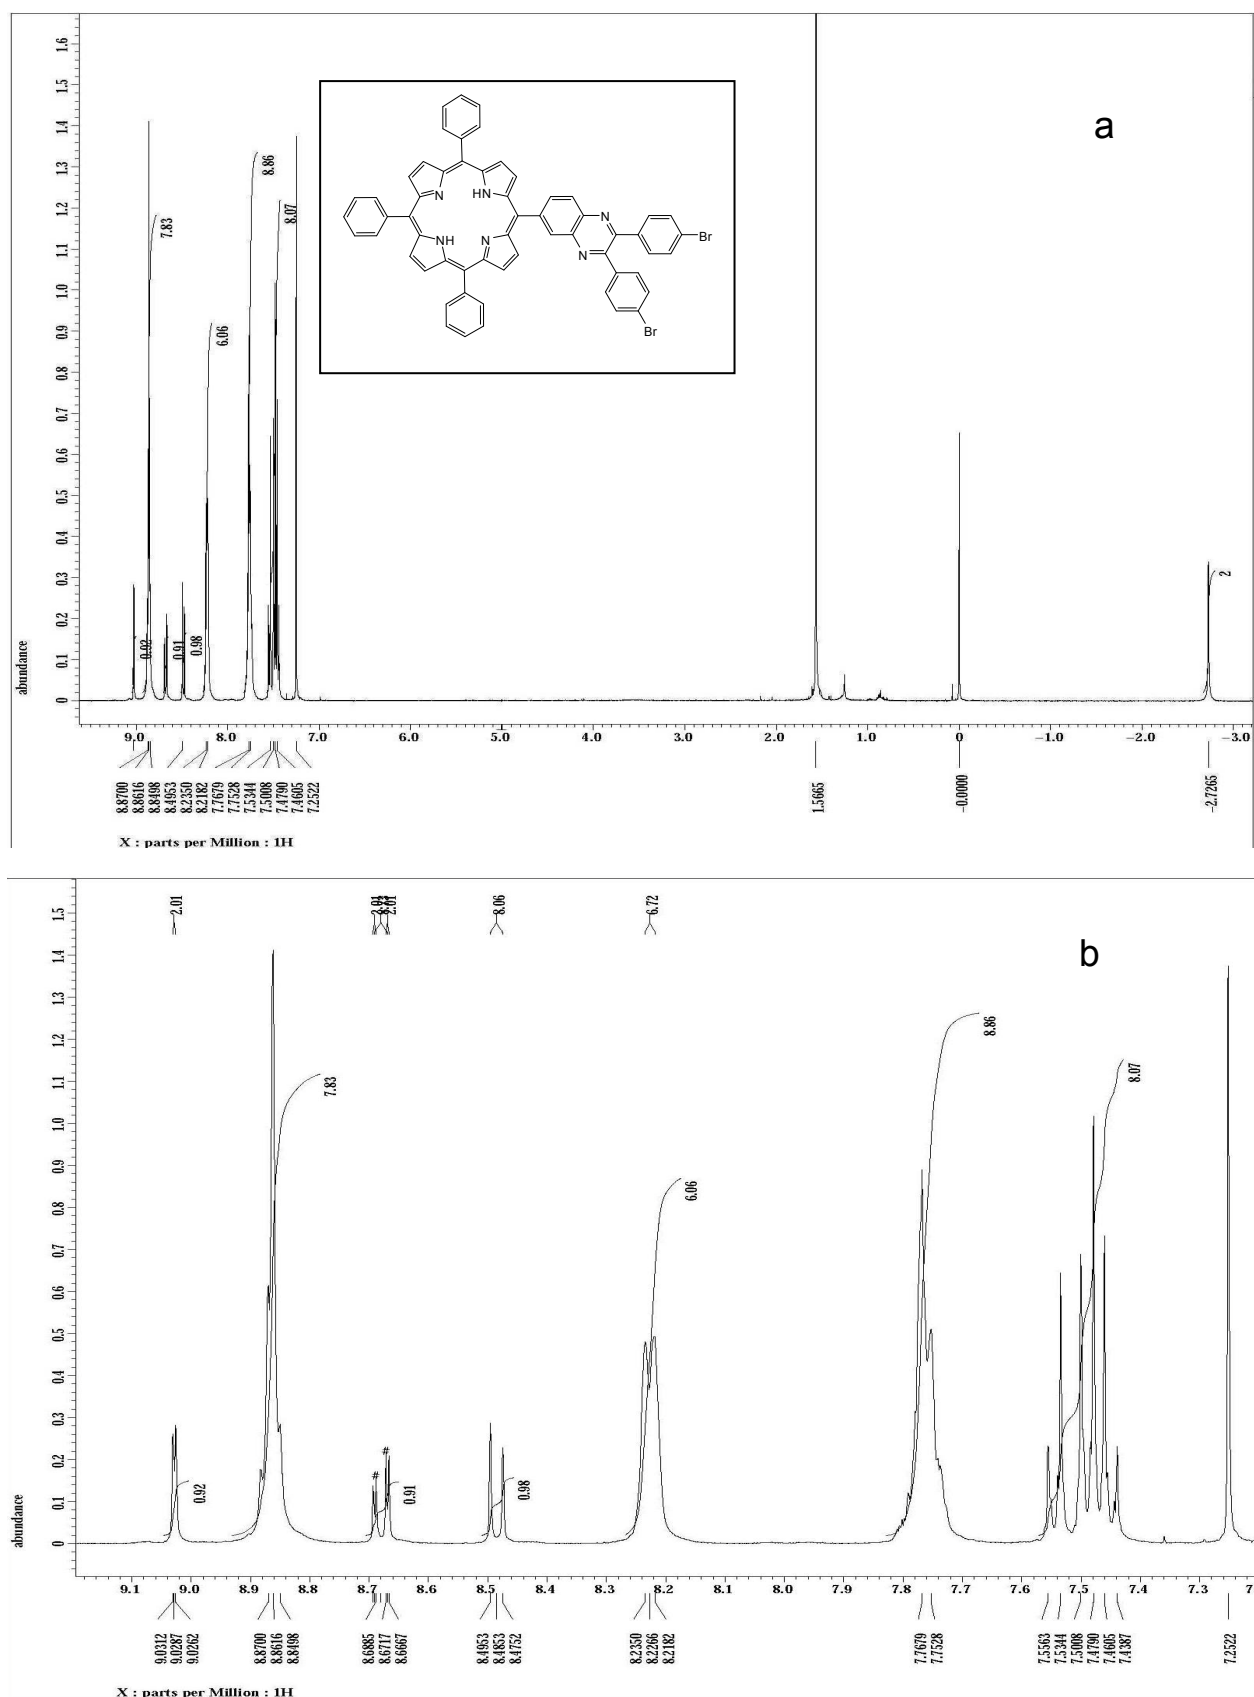

**Fig. 3:** (a)  $^1\text{H}$  NMR spectrum of 5-[2,3-bis-(4-bromophenyl)quinoxalin-6-yl]-10,15,20-triphenylporphyrin (**3c**); (b) Expanded region of  $^1\text{H}$  NMR spectrum of (**3c**).

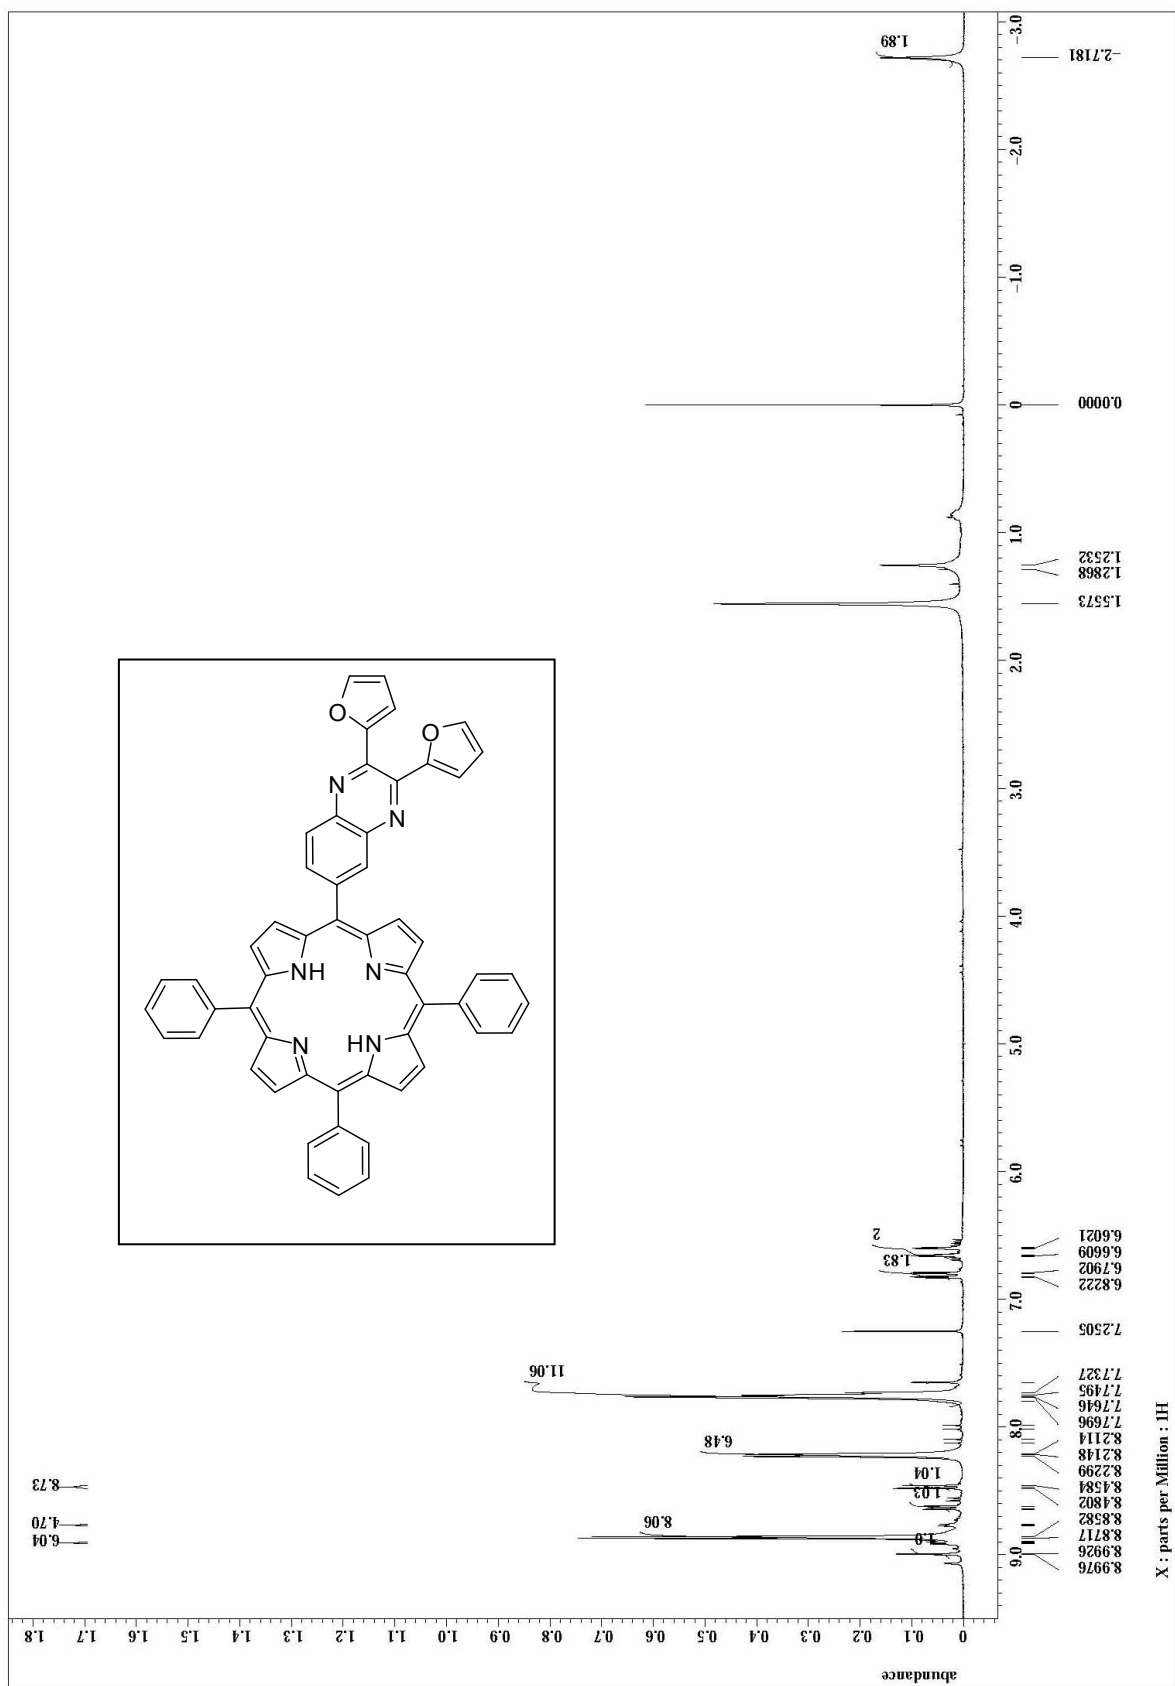

**Fig. 4:**  $^1\text{H}$  NMR Spectrum of 5-(2,3-difuran-2-yl-quinoxalin-6-yl)-10,15,20-triphenylporphyrin (3d).

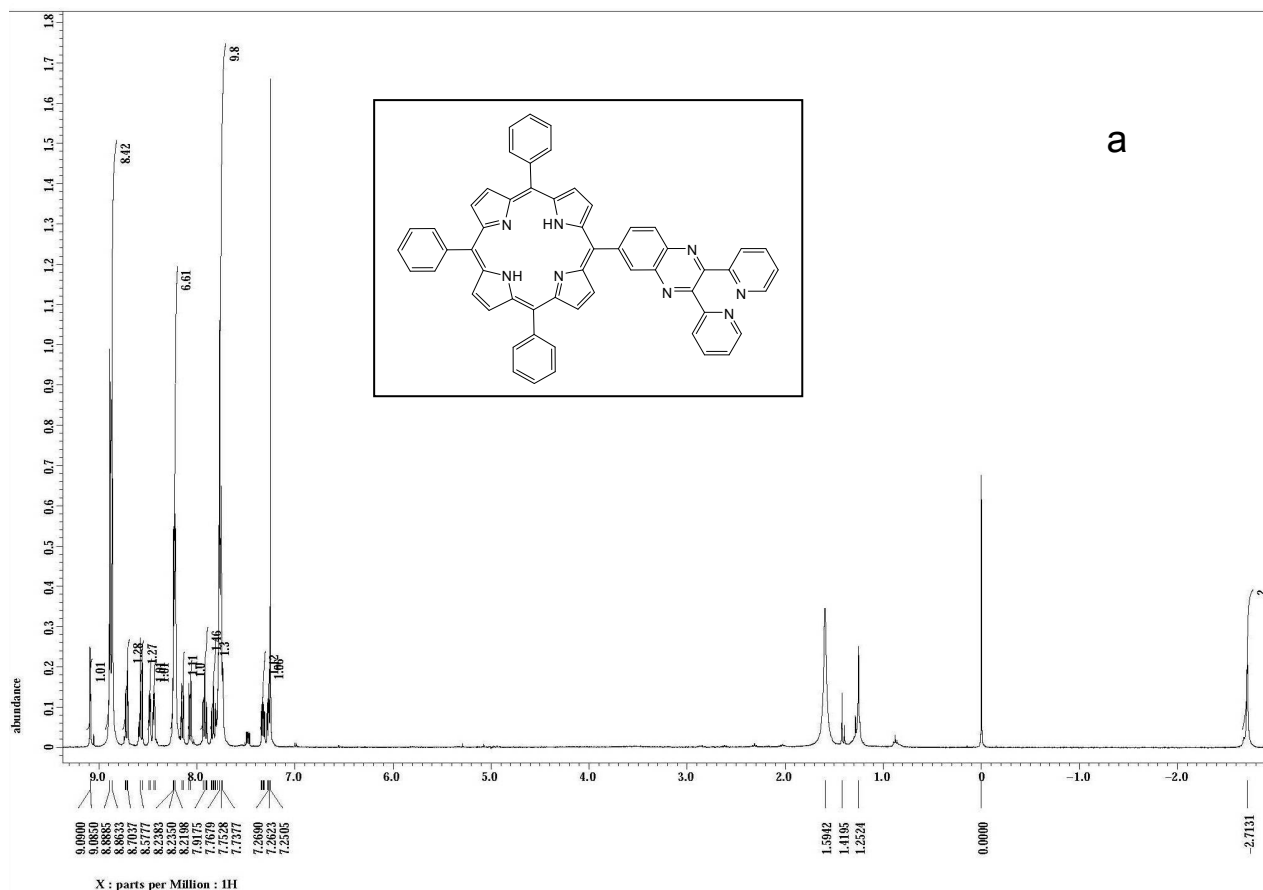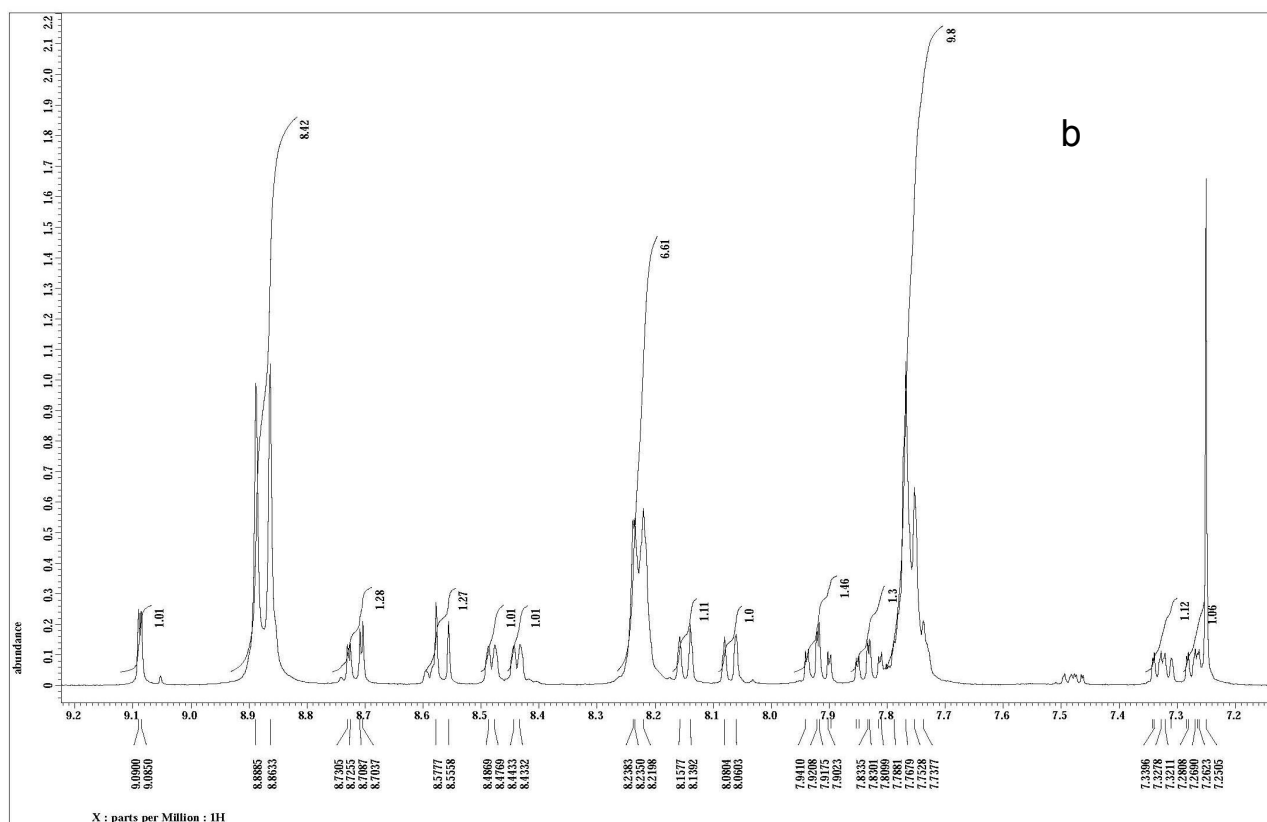

**Fig. 5:** (a)  $^1\text{H}$  NMR spectrum of 5-(2,3-dipyridin-2-yl-quinoxalin-6-yl)-10,15,20-triphenylporphyrin (**3e**); (b) Expanded region of  $^1\text{H}$  NMR spectrum of (**3e**).

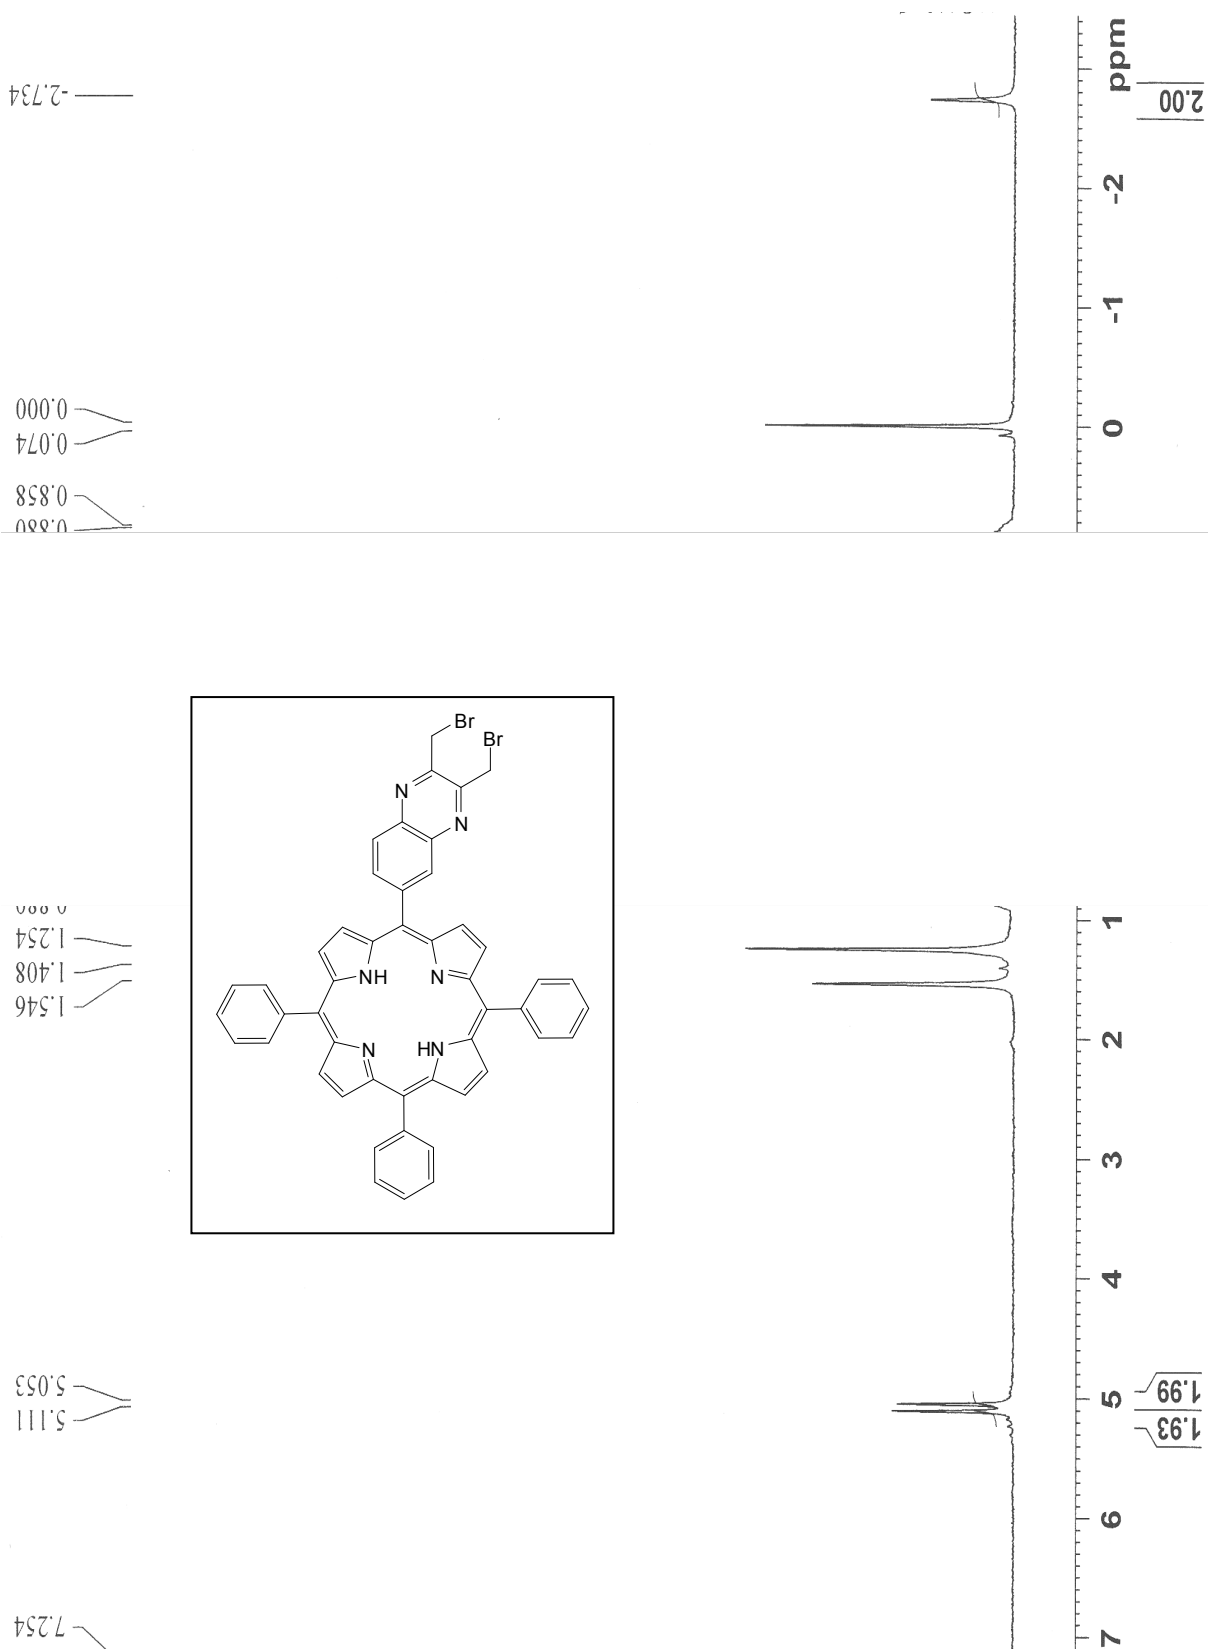

**Fig. 6:** <sup>1</sup>H NMR spectrum of 5-(2-(2,3-dibromomethyl)quinoxalin-6-yl)-10,15,20-triphenylporphyrin (3f).

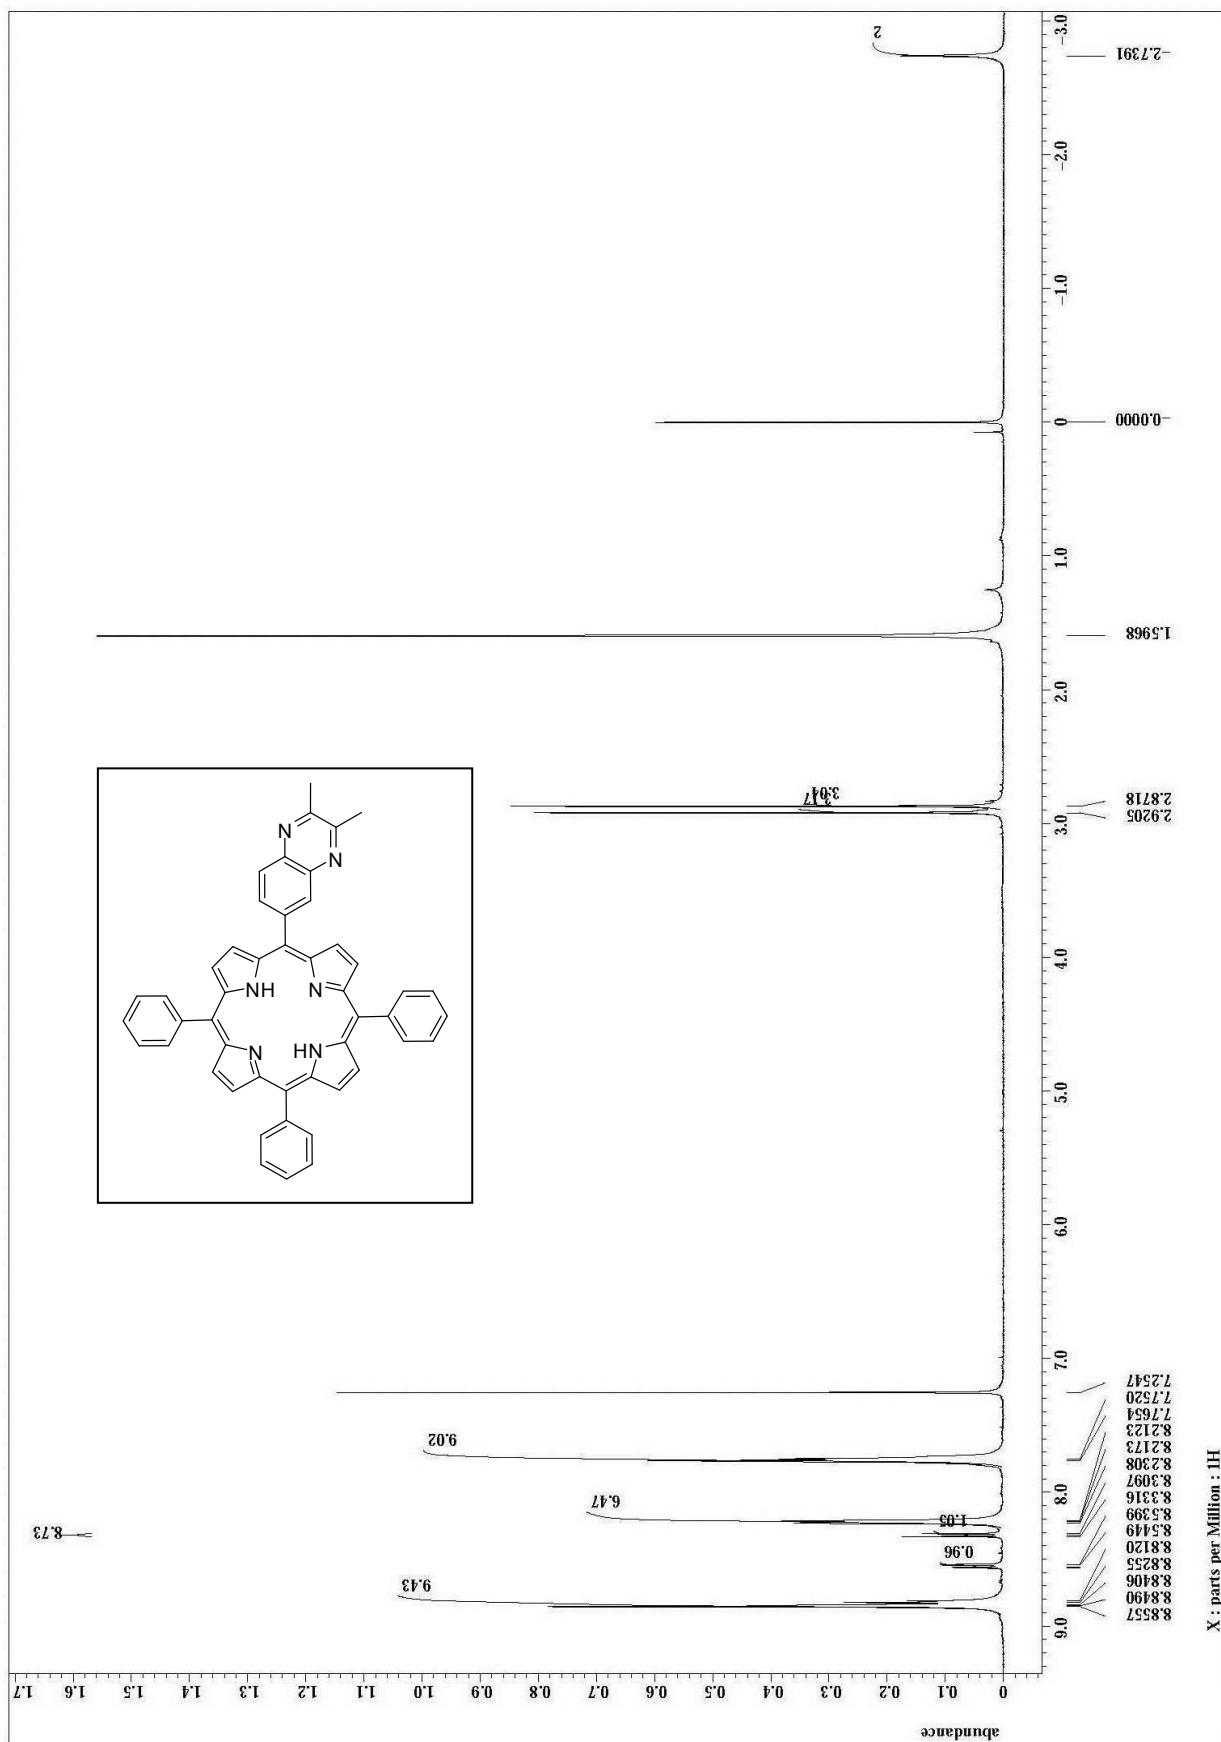

**Fig. 7:** <sup>1</sup>H NMR spectrum of 5-(2,3-dimethylquinoxalin-6-yl)-10,15,20-triphenylporphyrin (**3g**).



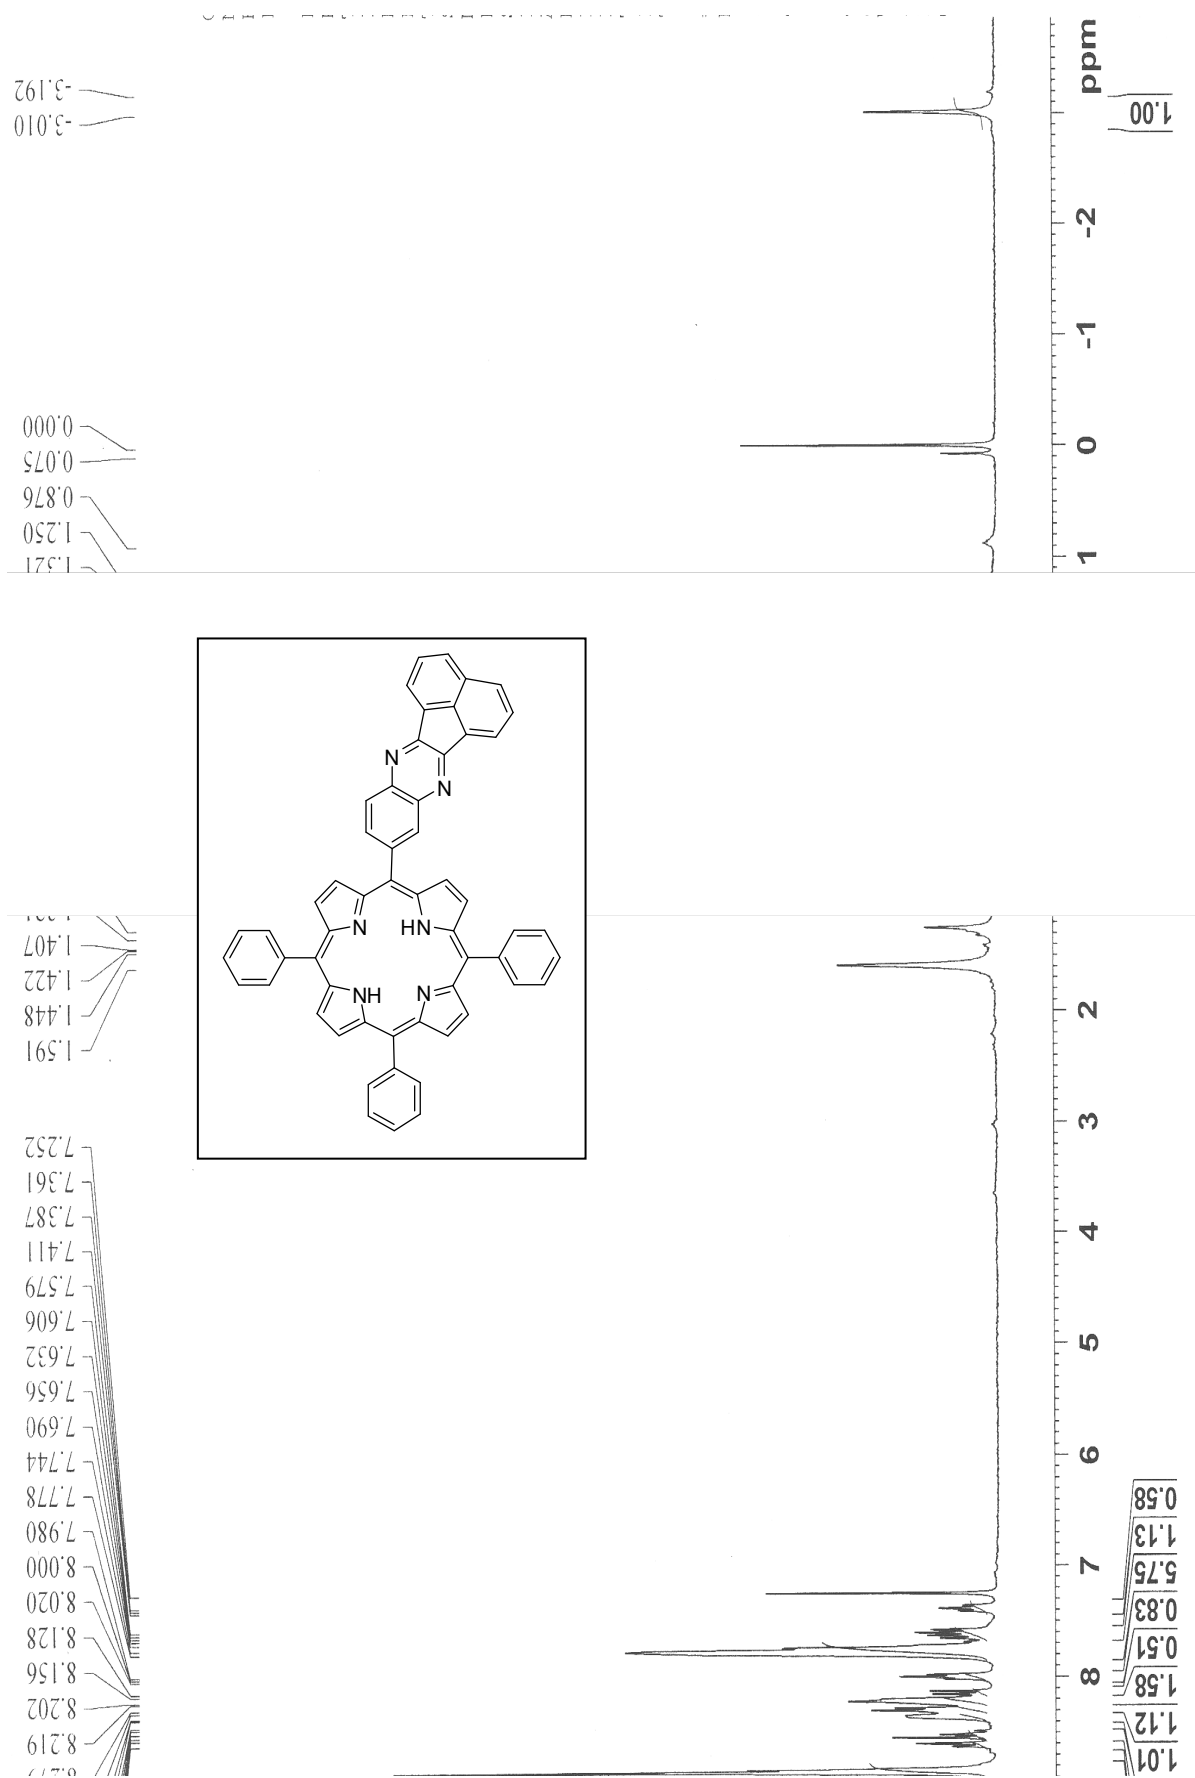

Fig. 8: <sup>1</sup>H NMR spectrum of 5-(acenaphtho[1,2-b]quinoxalin-9-yl)-10,15,20-triphenylporphyrin (4).

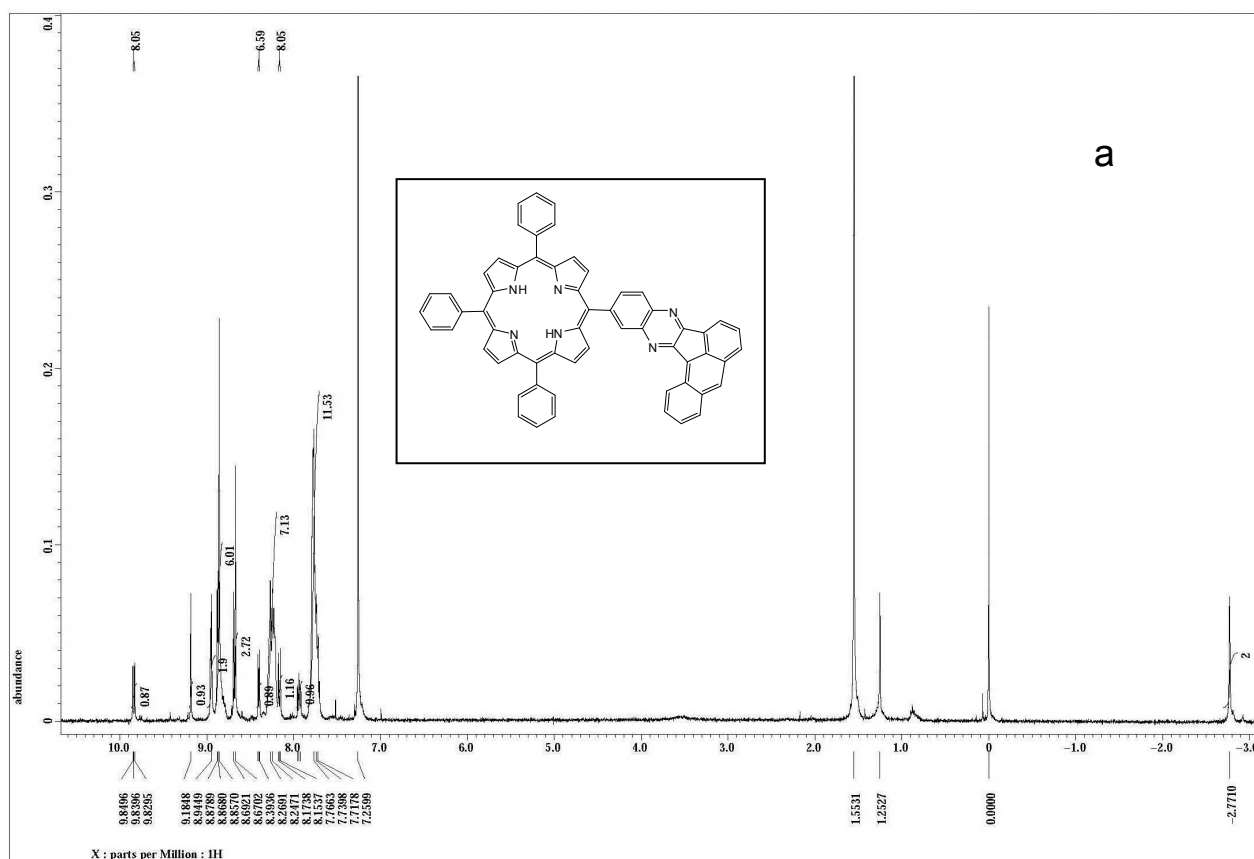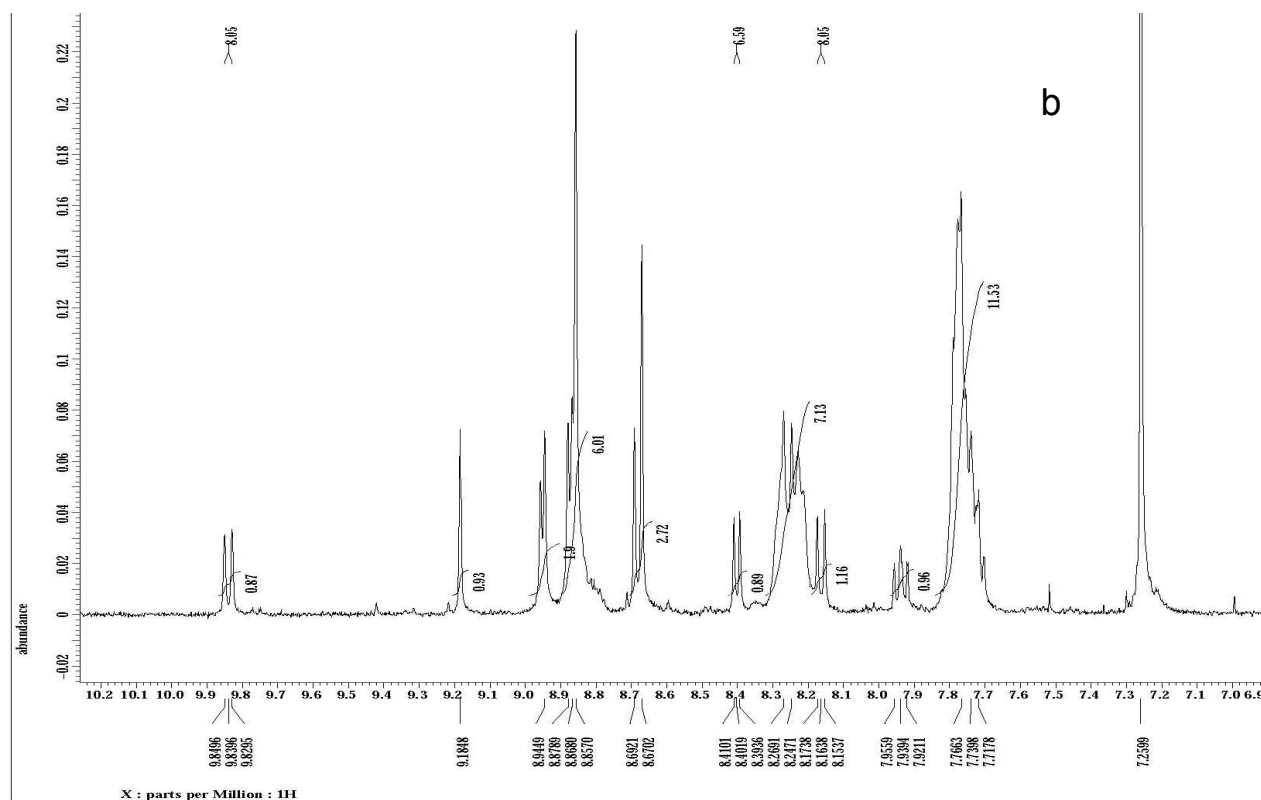

**Fig. 9:** (a)  $^1\text{H}$  NMR spectrum of 5-(aceanthryleno[1,2-b]quinoxalin-12-yl)-10,15,20-triphenylporphyrin (**5**); (b) Expanded region of  $^1\text{H}$  NMR spectrum of (**5**).

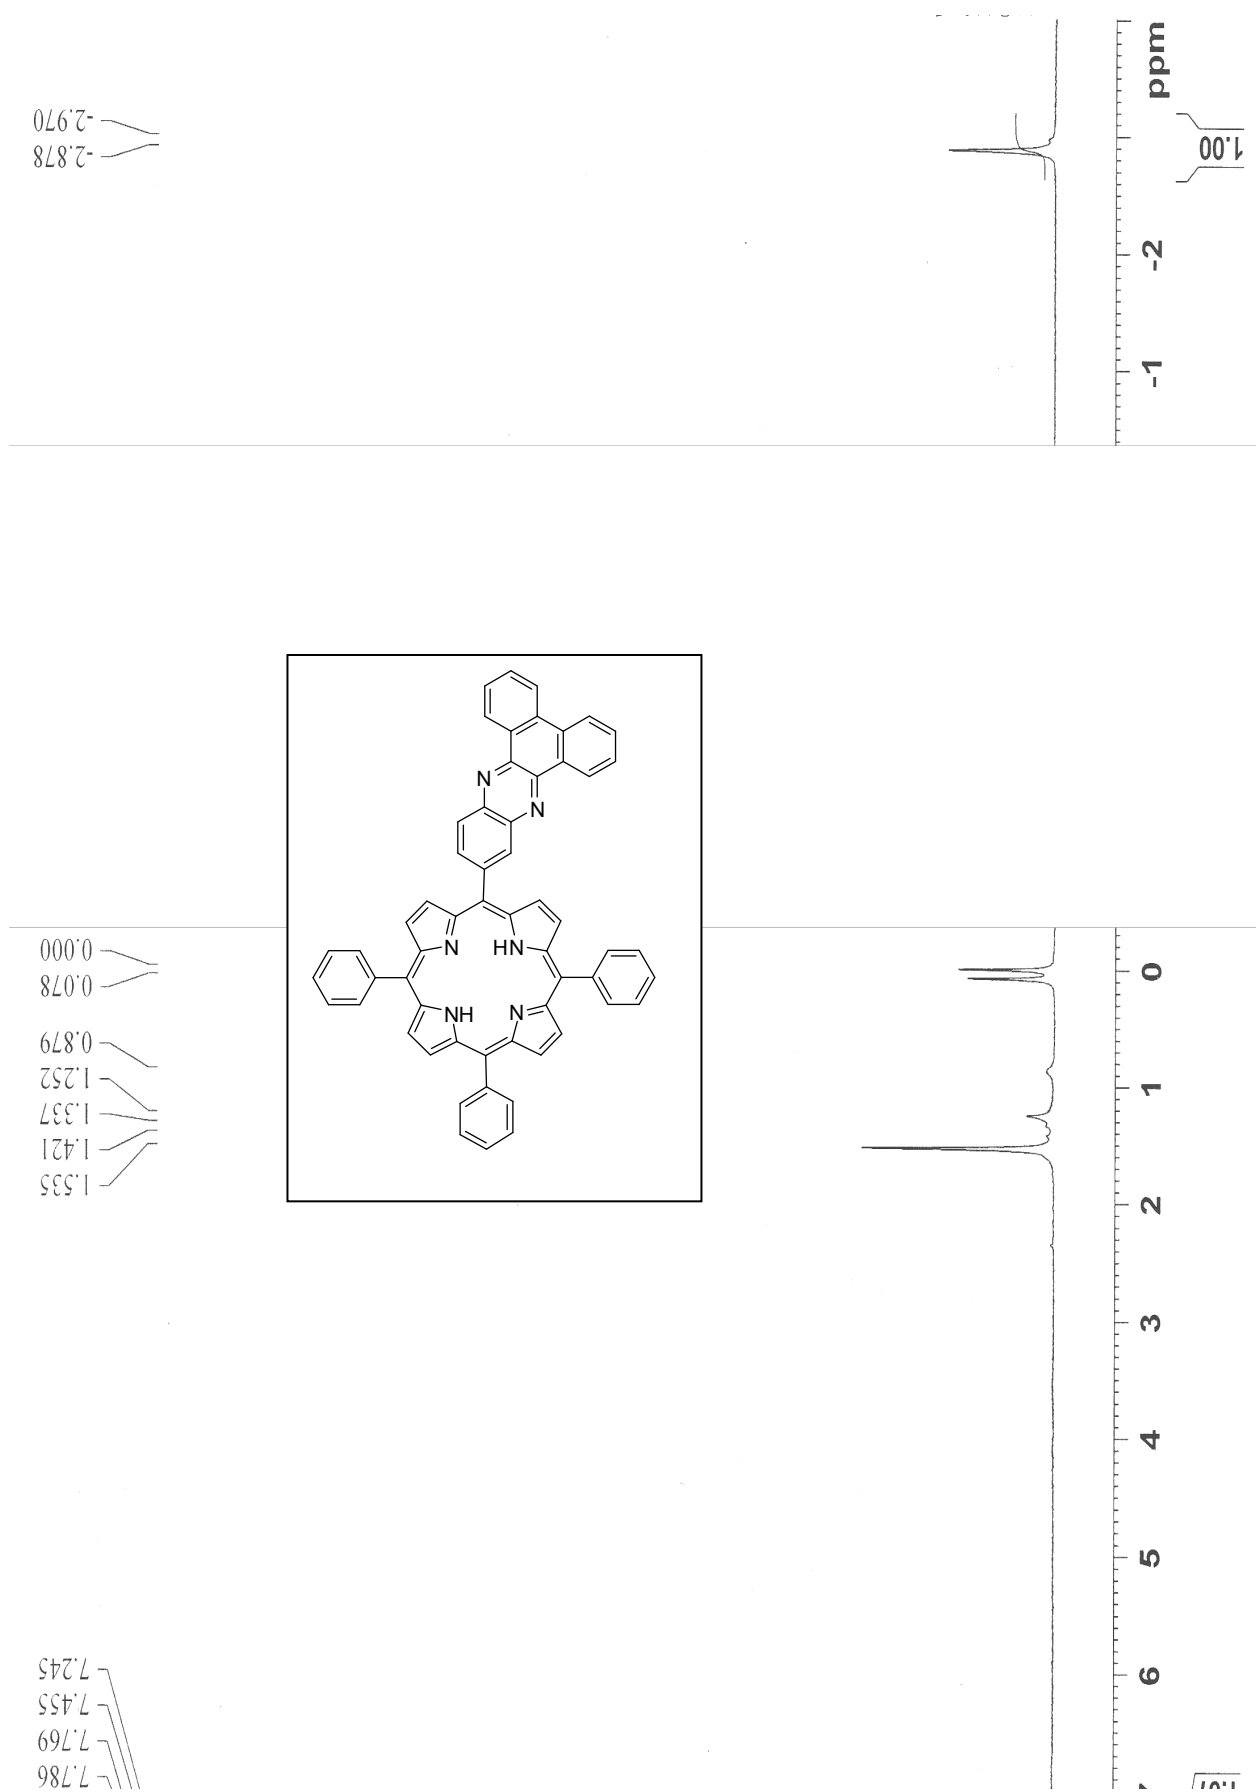

**Fig. 10:** <sup>1</sup>H NMR spectrum of 5-(dibenzo[a,c]phenazin-1(1-yl)-10,15,20-triphenylporphyrin (6)).

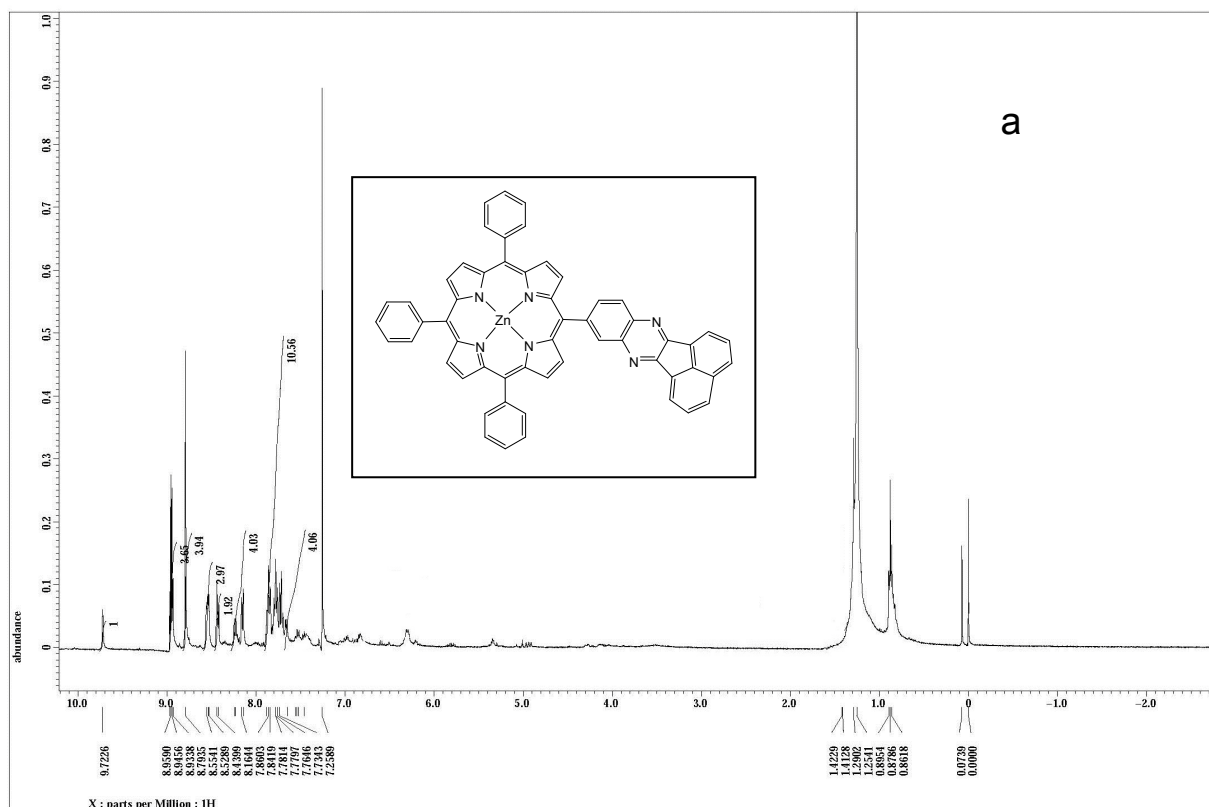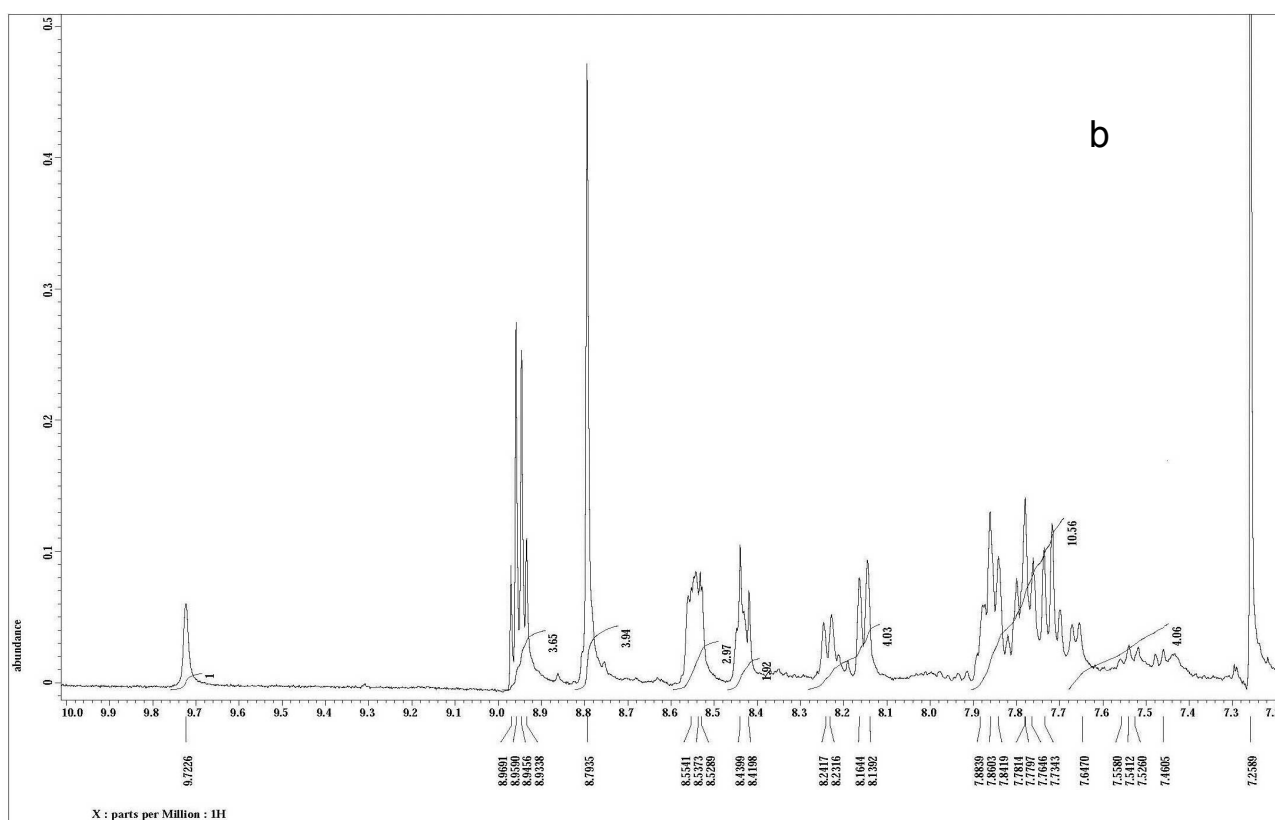

**Fig. 11:** (a)  $^1\text{H}$  NMR spectrum of zinc(II) 5-(acenaphtho[1,2-b]quinoxalin-9-yl)-10,15,20-triphenylporphyrin (**Zn-4**); (b) Expanded region of  $^1\text{H}$  NMR spectrum of (**Zn-4**).

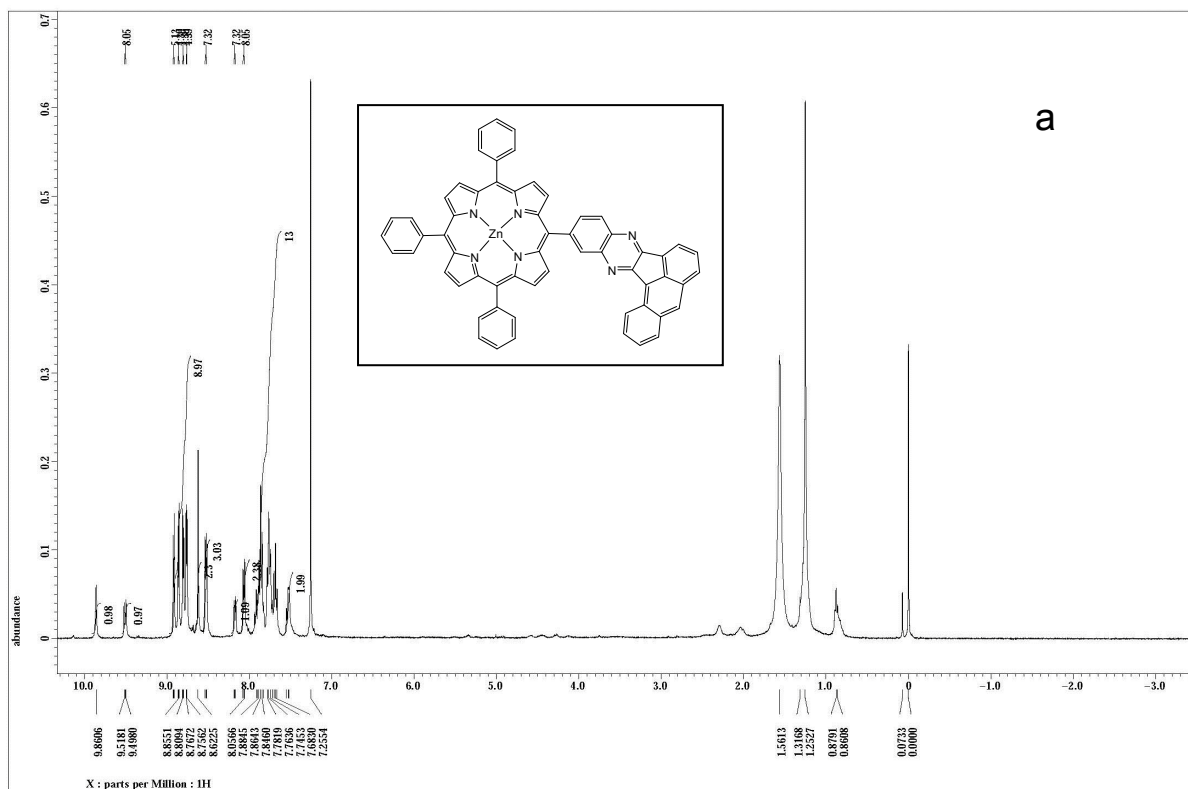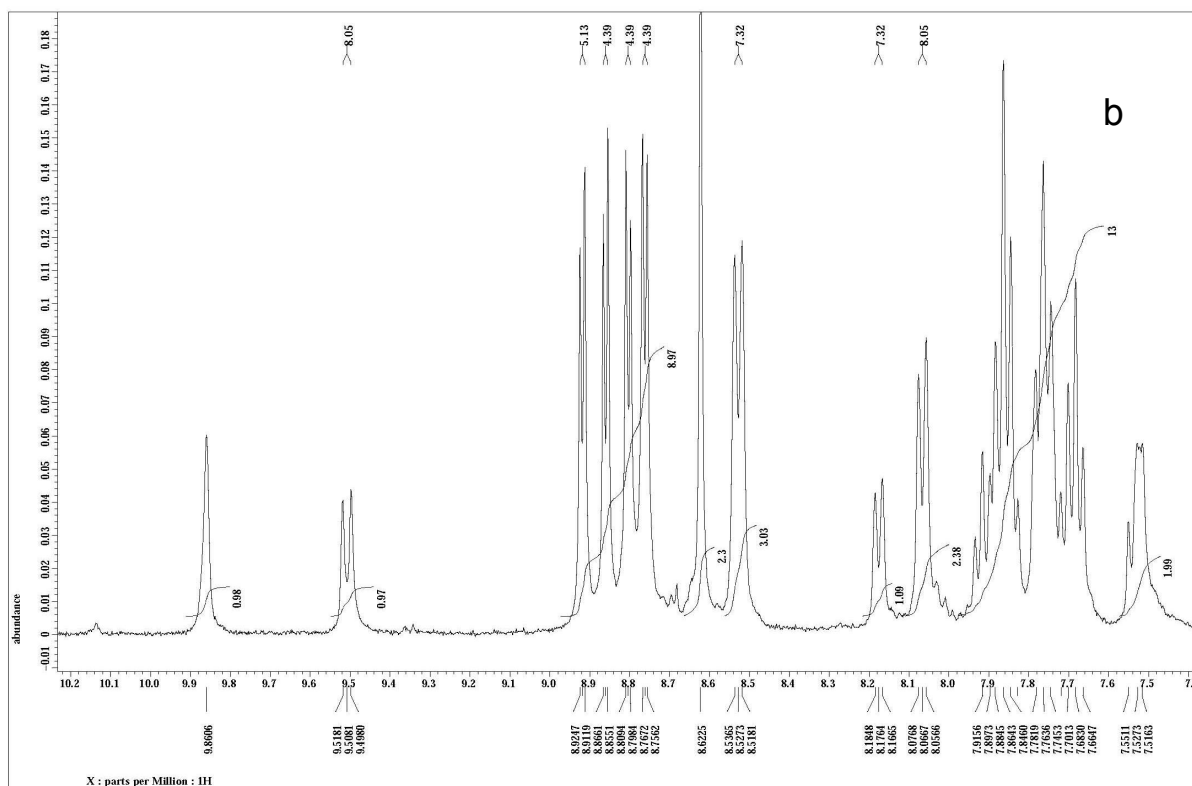

**Fig. 12: (a)**  $^1\text{H}$  NMR spectrum of zinc(II) 5-(aceanthryleno[1,2-b]quinoxalin-12-yl)-10,15,20-triphenylporphyrin (**Zn-5**); **(b)** Expanded region of  $^1\text{H}$  NMR spectrum of (**Zn-5**).



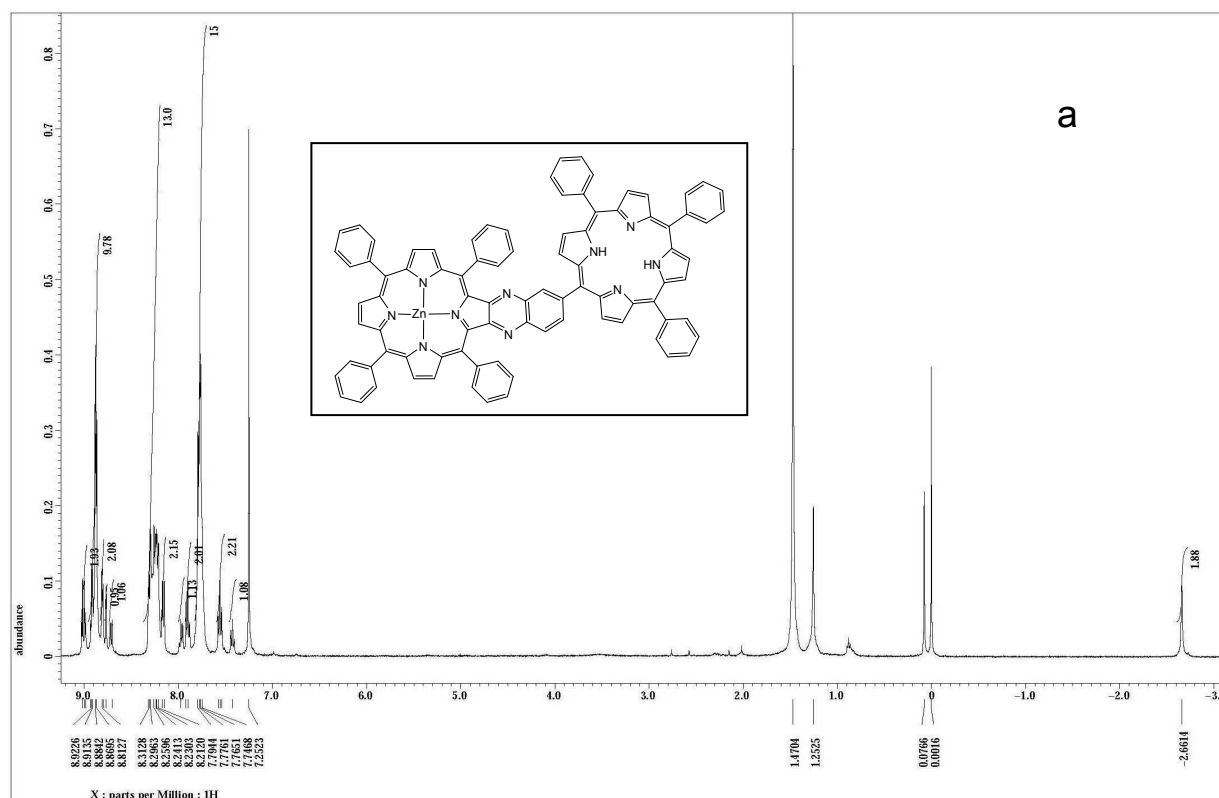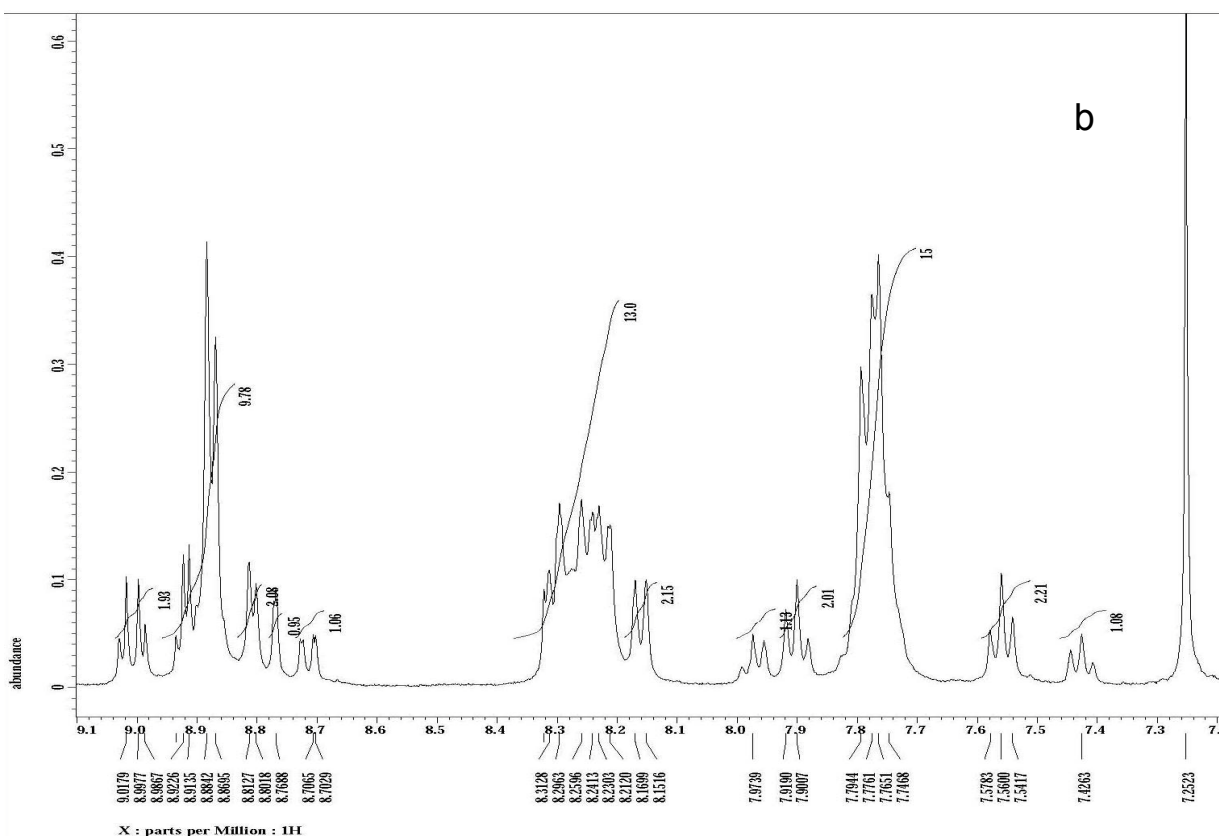

**Fig. 14:** (a)  $^1\text{H}$  NMR spectrum of 5-(zinc(II) 5,10,15,20-tetraphenylporphyrin[2,3-b]quinoxalin-6-yl)-10,15,20-triphenylporphyrin (**10a**); (b) Expanded region of  $^1\text{H}$  NMR spectrum of (**10a**).

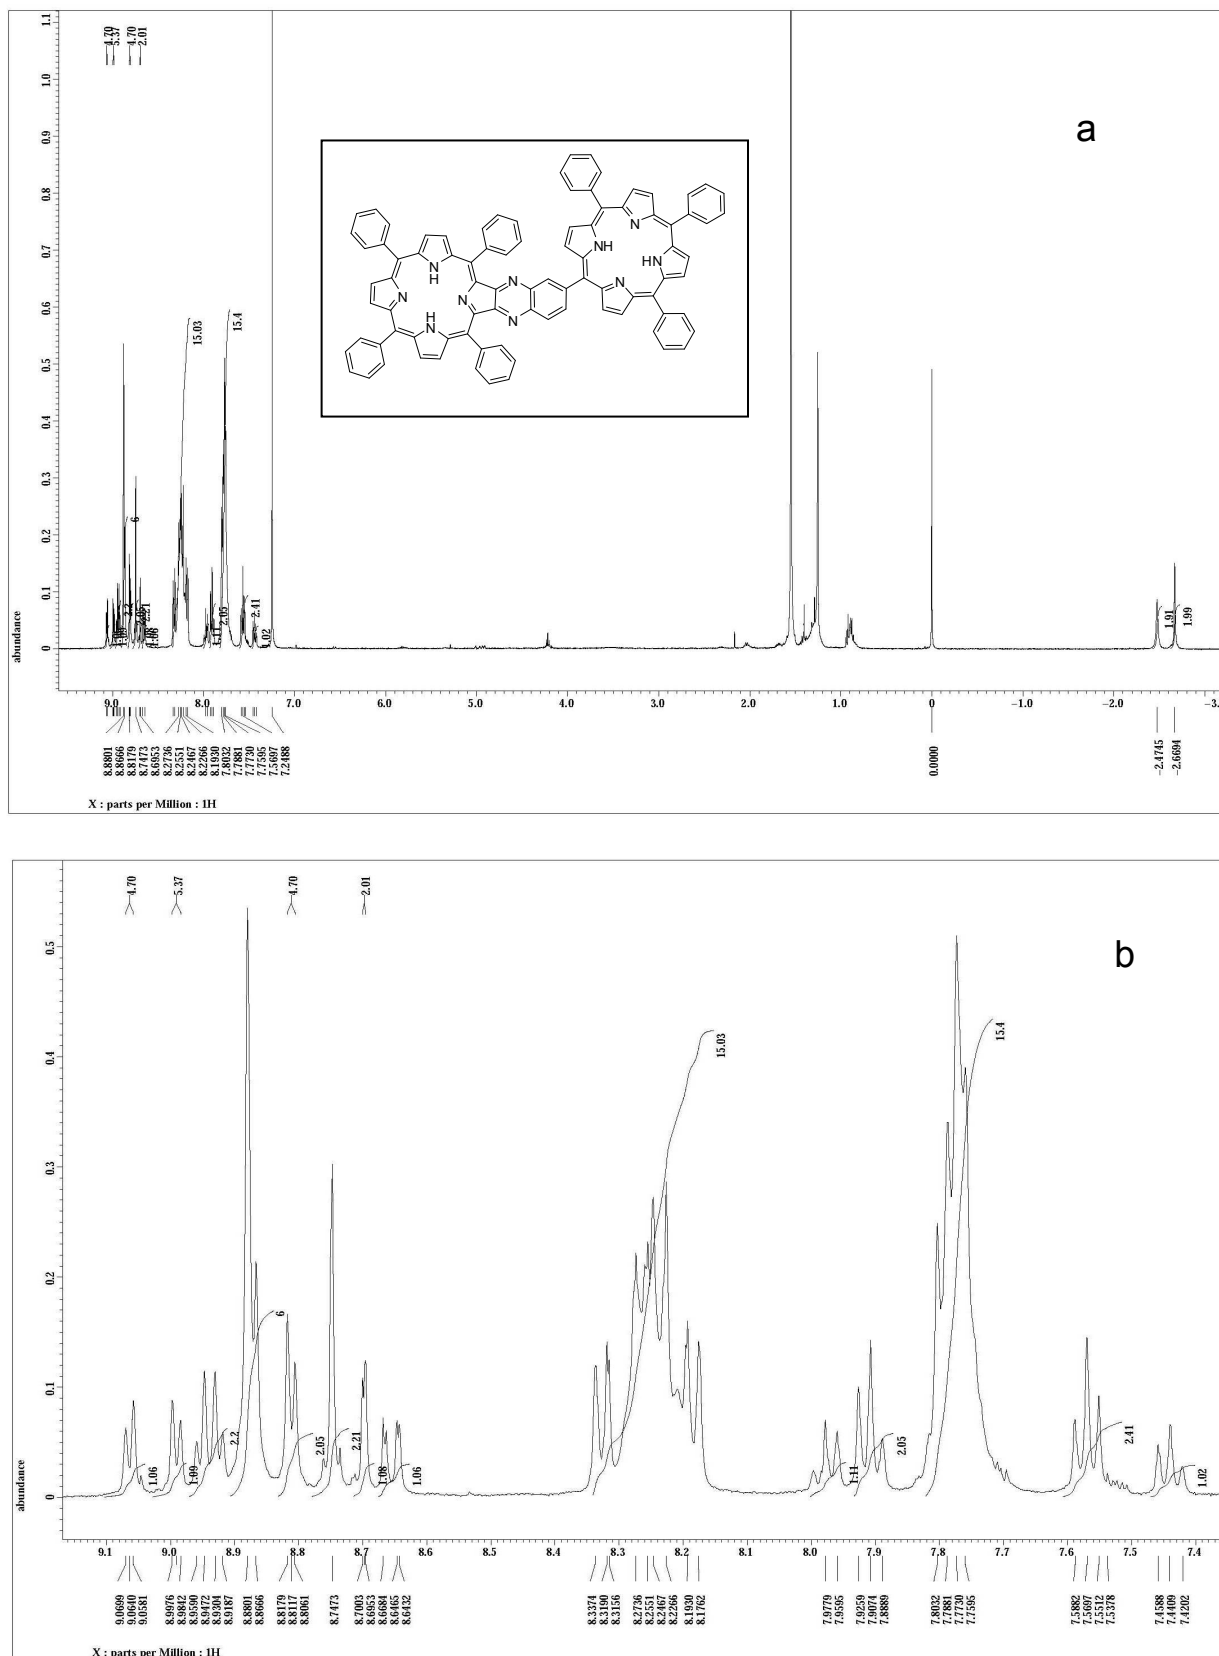

**Fig. 15:** (a) <sup>1</sup>H NMR spectrum of 5-(5,10,15,20-tetraphenylporphyrin[2,3-b]quinoxalin-6-yl)-10,15,20-triphenylporphyrin (**10b**); (b) Expanded region of <sup>1</sup>H NMR spectrum of (**10b**).



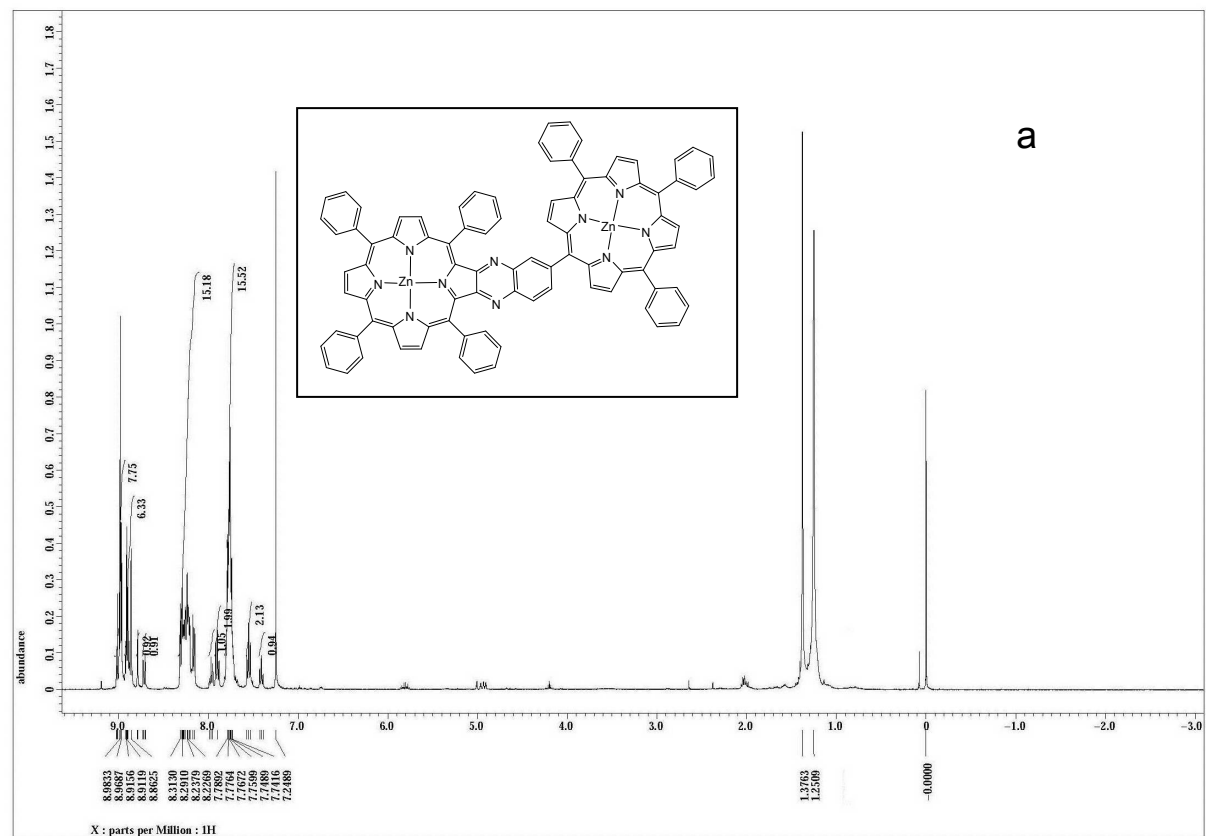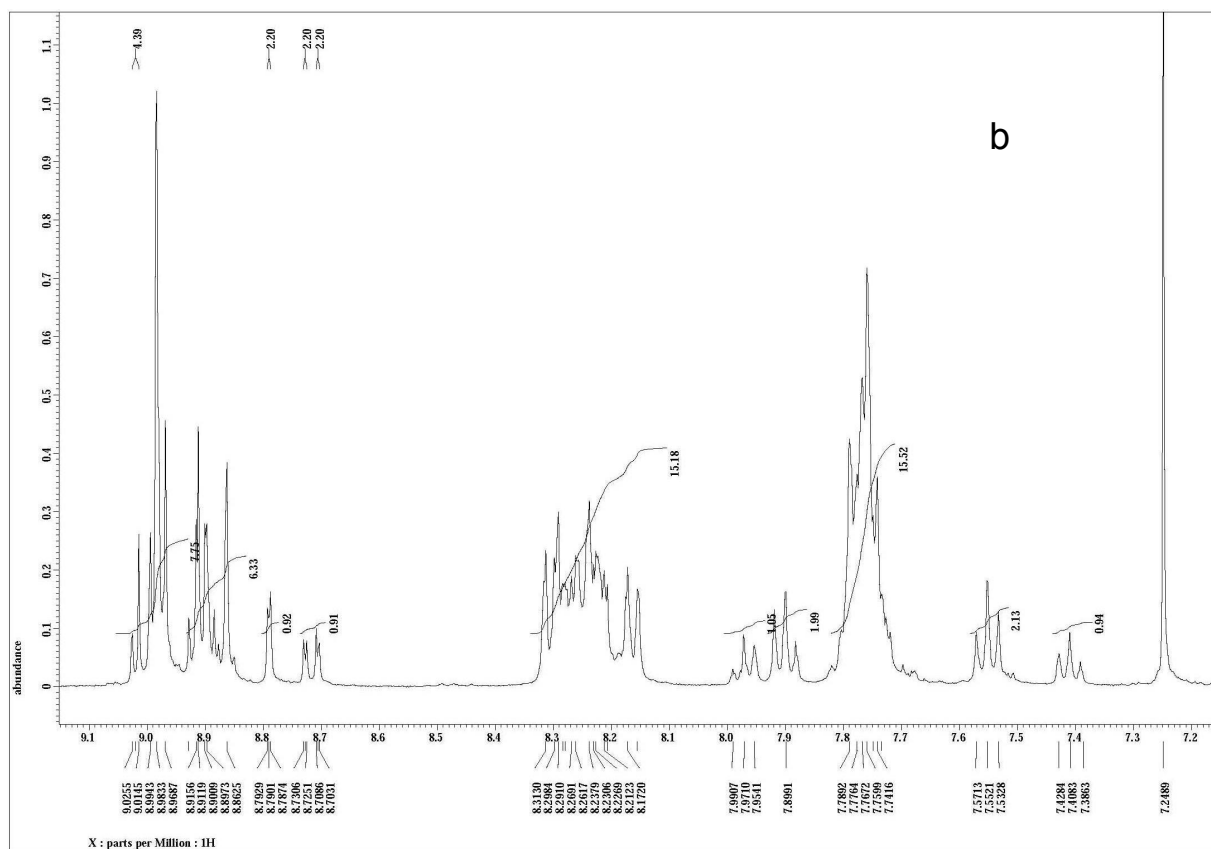

**Fig. 16:** (a)  $^1\text{H}$  NMR spectrum of zinc(II) 5-(zinc(II) 5,10,15,20-tetraphenylporphyrin[2,3-b]quinoxalin-6-yl)-10,15,20-triphenylporphyrin (**10c**); (b) Expanded region of  $^1\text{H}$  NMR spectrum of (**10c**).
